# Supplementary material for: De novo identification of universal cell mechanics gene signatures
Source: bioRxiv or medRxiv preprint supplement (doi:10.1101/2021.04.26.441418), 2025-02-06
Supplement: Supplementary file [file media-1.pdf]

*Supplementary Information*

**De novo identification of universal cell  
mechanics regulators**

Urbanska, Ge, *et al.*

## Supplementary Tables

**Supplementary Table 1 | Combined *PC-corr* values calculated as means of the two analyzed sets specifying the values for network edges.** Edges above a cut-off of 0.75 are displayed. The cut-off is indicated with a horizontal line at the bottom.

|    | node <i>i</i>   | node <i>j</i>  | edge, $PC-corr_{i,j}^{comb}$ |
|----|-----------------|----------------|------------------------------|
| 1  | <i>FHL2</i>     | <i>THBS1</i>   | 0.863                        |
| 2  | <i>ANKRD1</i>   | <i>IL11</i>    | 0.813                        |
| 3  | <i>MFAP5</i>    | <i>THBS1</i>   | 0.803                        |
| 4  | <i>FHL2</i>     | <i>IGFBP7</i>  | 0.788                        |
| 5  | <i>IGFBP7</i>   | <i>THBS1</i>   | 0.788                        |
| 6  | <i>C1QTNF1</i>  | <i>IGFBP6</i>  | 0.785                        |
| 7  | <i>FHL2</i>     | <i>TAGLN</i>   | 0.782                        |
| 8  | <i>IGFBP7</i>   | <i>TAGLN</i>   | 0.782                        |
| 9  | <i>TAGLN</i>    | <i>THBS1</i>   | 0.782                        |
| 10 | <i>ATP8B1</i>   | <i>FHL2</i>    | 0.780                        |
| 11 | <i>CNN2</i>     | <i>FHL2</i>    | 0.774                        |
| 12 | <i>FHL2</i>     | <i>MFAP5</i>   | 0.767                        |
| 13 | <i>LRRC15</i>   | <i>THBS1</i>   | 0.766                        |
| 14 | <i>CAV1</i>     | <i>FHL2</i>    | 0.765                        |
| 15 | <i>CAV1</i>     | <i>IGFBP7</i>  | 0.765                        |
| 16 | <i>CAV1</i>     | <i>TAGLN</i>   | 0.765                        |
| 17 | <i>CAV1</i>     | <i>THBS1</i>   | 0.765                        |
| 18 | <i>C1QTNF1</i>  | <i>CLIC3</i>   | 0.762                        |
| 19 | <i>FHL2</i>     | <i>IGFBP3</i>  | 0.758                        |
| 20 | <i>DPYSL5</i>   | <i>INSM1</i>   | 0.758                        |
| 21 | <i>CLIC3</i>    | <i>TRIM29</i>  | 0.756                        |
| 22 | <i>C1QTNF1</i>  | <i>KRT80</i>   | 0.756                        |
| 23 | <i>FHL2</i>     | <i>WISP2</i>   | 0.754                        |
| 24 | <i>THBS1</i>    | <i>WISP2</i>   | 0.754                        |
| 25 | <i>CAV1</i>     | <i>MRGPRF</i>  | 0.754                        |
| 26 | <i>ARHGDI B</i> | <i>IL7R</i>    | 0.754                        |
| 27 | <i>CXXC4</i>    | <i>DPYSL5</i>  | 0.752                        |
| 28 | <i>ABCC3</i>    | <i>IER3</i>    | 0.752                        |
| 29 | <i>CLDN4</i>    | <i>TACSTD2</i> | 0.751                        |
| 30 | <i>CYR61</i>    | <i>MFAP5</i>   | 0.751                        |

↑ cut-off 0.75

**Supplementary Table 2 | Combined *PC-corr* values calculated as minimum values of the two analyzed sets specifying the values for network edges.** Edges above a cut-off of 0.70 are displayed. Cut-offs 0.70 and 0.75 are marked with a horizontal line.

|    | node <i>i</i>  | node <i>j</i> | edge $PC-corr_{i,j}^{comb}$ |                |
|----|----------------|---------------|-----------------------------|----------------|
| 1  | <i>FHL2</i>    | <i>THBS1</i>  | 0.803                       |                |
| 2  | <i>FHL2</i>    | <i>IGFBP7</i> | 0.785                       |                |
| 3  | <i>IGFBP7</i>  | <i>THBS1</i>  | 0.785                       |                |
| 4  | <i>FHL2</i>    | <i>TAGLN</i>  | 0.782                       |                |
| 5  | <i>IGFBP7</i>  | <i>TAGLN</i>  | 0.782                       |                |
| 6  | <i>TAGLN</i>   | <i>THBS1</i>  | 0.782                       |                |
| 7  | <i>ANKRD1</i>  | <i>IL11</i>   | 0.781                       |                |
| 8  | <i>CAV1</i>    | <i>FHL2</i>   | 0.759                       |                |
| 9  | <i>CAV1</i>    | <i>IGFBP7</i> | 0.759                       |                |
| 10 | <i>CAV1</i>    | <i>TAGLN</i>  | 0.759                       |                |
| 11 | <i>CAV1</i>    | <i>THBS1</i>  | 0.759                       |                |
| 12 | <i>CLIC3</i>   | <i>TRIM29</i> | 0.751                       | ↑ cut-off 0.75 |
| 13 | <i>ATP8B1</i>  | <i>FHL2</i>   | 0.748                       |                |
| 14 | <i>CAV1</i>    | <i>MRGPRF</i> | 0.736                       |                |
| 15 | <i>FHL2</i>    | <i>IGFBP3</i> | 0.733                       |                |
| 16 | <i>ARHGDIB</i> | <i>IL7R</i>   | 0.726                       |                |
| 17 | <i>CYR61</i>   | <i>MFAP5</i>  | 0.725                       |                |
| 18 | <i>IGFBP3</i>  | <i>TAGLN</i>  | 0.718                       |                |
| 19 | <i>MAL</i>     | <i>TRIM29</i> | 0.718                       |                |
| 20 | <i>FHL2</i>    | <i>LBH</i>    | 0.717                       |                |
| 21 | <i>FHL2</i>    | <i>MRGPRF</i> | 0.716                       |                |
| 22 | <i>MRGPRF</i>  | <i>THBS1</i>  | 0.709                       |                |
| 23 | <i>CLIC3</i>   | <i>SYT8</i>   | 0.709                       |                |
| 24 | <i>LBH</i>     | <i>TAGLN</i>  | 0.706                       |                |
| 25 | <i>IGFBP6</i>  | <i>MRGPRF</i> | 0.705                       |                |
| 26 | <i>ASCL1</i>   | <i>LRRN2</i>  | 0.703                       |                |
| 27 | <i>ATP8B1</i>  | <i>MRGPRF</i> | 0.702                       |                |
| 28 | <i>SYT8</i>    | <i>TRIM29</i> | 0.701                       |                |
| 29 | <i>CYR61</i>   | <i>THBS1</i>  | 0.700                       | ↑ cut-off 0.70 |

**Supplementary Table 3 | List of target genes together with their processed PC loadings.**

|    | gene name      | gene description                                 | $V_t^1$ | $V_t^2$ | $\bar{V}$ |
|----|----------------|--------------------------------------------------|---------|---------|-----------|
| 1  | <i>ABCC3</i>   | ATP binding cassette subfamily C member 3        | 0.849   | 0.693   | 0.771     |
| 2  | <i>ANKRD1</i>  | ankyrin repeat domain 1                          | 0.933   | 0.781   | 0.857     |
| 3  | <i>ARHGDI3</i> | Rho GDP dissociation inhibitor beta              | 0.726   | 0.933   | 0.829     |
| 4  | <i>ASCL1</i>   | achaete-scute family bHLH transcription factor 1 | -0.703  | -0.813  | -0.758    |
| 5  | <i>ATP8B1</i>  | ATPase phospholipid transporting 8B1             | 0.813   | 0.748   | 0.780     |
| 6  | <i>C1QTNF1</i> | C1q and TNF related 1                            | 0.895   | 0.697   | 0.796     |
| 7  | <i>CAV1</i>    | caveolin 1                                       | 0.772   | 0.759   | 0.765     |
| 8  | <i>CLDN4</i>   | claudin 4                                        | 0.754   | 0.919   | 0.836     |
| 9  | <i>CLIC3</i>   | chloride intracellular channel 3                 | 0.827   | 0.794   | 0.810     |
| 10 | <i>CNN2</i>    | calponin 2                                       | 0.673   | 0.920   | 0.796     |
| 11 | <i>CXXC4</i>   | CXXC finger protein 4                            | -0.614  | -0.891  | -0.752    |
| 12 | <i>CYR61</i>   | cellular communication network factor 1          | 0.777   | 0.754   | 0.765     |
| 13 | <i>DPYSL5</i>  | dihydropyrimidinase like 5                       | -0.686  | -0.970  | -0.828    |
| 14 | <i>FHL2</i>    | four and a half LIM domains 2                    | 0.951   | 0.927   | 0.939     |
| 15 | <i>IER3</i>    | immediate early response 3                       | 0.841   | 0.918   | 0.879     |
| 16 | <i>IGFBP3</i>  | insulin like growth factor binding protein 3     | 0.733   | 0.904   | 0.819     |
| 17 | <i>IGFBP6</i>  | insulin like growth factor binding protein 6     | 0.879   | 0.749   | 0.814     |
| 18 | <i>IGFBP7</i>  | insulin like growth factor binding protein 7     | 0.790   | 0.785   | 0.788     |
| 19 | <i>IL11</i>    | interleukin 11                                   | 0.845   | 0.880   | 0.862     |
| 20 | <i>IL7R</i>    | interleukin 7 receptor                           | 0.788   | -0.786  | 0.001     |
| 21 | <i>INSM1</i>   | INSM transcriptional repressor 1                 | -0.739  | -0.979  | -0.859    |
| 22 | <i>KRT80</i>   | keratin 80                                       | 0.872   | 0.639   | 0.756     |
| 23 | <i>LBH</i>     | LBH regulator of WNT signaling pathway           | 0.731   | 0.717   | 0.724     |
| 24 | <i>LRRC15</i>  | leucine rich repeat containing 15                | 0.916   | -0.617  | 0.149     |
| 25 | <i>LRRN2</i>   | leucine rich repeat neuronal 2                   | -0.721  | -0.733  | -0.727    |
| 26 | <i>MAL</i>     | mal, T cell differentiation protein              | 0.724   | 0.841   | 0.782     |
| 27 | <i>MFAP5</i>   | microfibril associated protein 5                 | 0.921   | 0.725   | 0.823     |
| 28 | <i>MRGPRF</i>  | MAS related GPR family member F                  | 0.775   | 0.751   | 0.763     |
| 29 | <i>SYT8</i>    | synaptotagmin 8                                  | 0.746   | 0.709   | 0.727     |
| 30 | <i>TACSTD2</i> | tumor associated calcium signal transducer 2     | 0.689   | 0.833   | 0.761     |
| 31 | <i>TAGLN</i>   | transgelin                                       | 0.782   | 0.782   | 0.782     |
| 32 | <i>THBS1</i>   | thrombospondin 1                                 | 0.922   | 0.803   | 0.863     |
| 33 | <i>TRIM29</i>  | tripartite motif containing 29                   | 0.751   | 0.760   | 0.756     |
| 34 | <i>WISP2</i>   | cellular communication network factor 5          | 0.834   | 0.674   | 0.754     |

**Supplementary Table 4 | Carcinoma cell lines.** List of all carcinoma cell lines acquired from RIKEN institute used in this study, together with the catalogue number, tissue of origin, carcinoma type, growth medium specification, and passage number at purchase. non-sc – non small-cell, sq – squamous cell, ad – adenocarcinoma.

| cell line | cat no  | tissue    | type        | medium (Gibco cat no) | serum | passage |
|-----------|---------|-----------|-------------|-----------------------|-------|---------|
| ECC4      | RCB0982 | intestine | small-cell  | RPMI1640 (11875093)   | 10%   | 7       |
| TGBC18TKB | RCB1169 | intestine | non-sc (ad) | DMEM (11885084)       | 5%    | 5       |
| WA-hT     | RCB2279 | lung      | small-cell  | MEM (11095080)        | 10%   | 54      |
| EBC-1     | RCB1965 | lung      | non-sc (sq) | MEM (11095080)        | 10%   | 7       |
| A549      | RCB0098 | lung      | non-sc (ad) | DMEM (11885084)       | 10%   | 92      |
| ECC10     | RCB0983 | stomach   | small-cell  | RPMI1640 (11875093)   | 10%   | 8       |
| MKN45     | RCB1001 | stomach   | non-sc (ad) | RPMI1640 (11875093)   | 10%   | 6       |
| MKN1      | RCB1003 | stomach   | non-sc (ad) | RPMI1640 (11875093)   | 10%   | 6       |

**Supplementary Table 5 | Mechanical characterizations of cells from the individual datasets using RT-DC.** For each dataset experimental details of the measuring conditions are listed, including the widths of channel constriction ( $w_{channel}$ ), total flow rates ( $Q_{total}$ ), percentages of methylcellulose (MC) in the measurement buffer (buffer % MC), effective viscosity of the measurement buffer in the channel at the flowrate used ( $\eta_{eff}$ , according to ref.<sup>1</sup>), as well as gates used for data filtering.

|              | measurement conditions             |                                         |                |                                         | data filtering              |            |
|--------------|------------------------------------|-----------------------------------------|----------------|-----------------------------------------|-----------------------------|------------|
|              | $w_{channel}$<br>( $\mu\text{m}$ ) | $Q_{total}$<br>( $\mu\text{l s}^{-1}$ ) | buffer<br>% MC | $\eta_{eff}$<br>( $\text{mPa s}^{-1}$ ) | area<br>( $\mu\text{m}^2$ ) | area ratio |
| glioblastoma | 30                                 | 0.16                                    | 0.5            | 5.4                                     | 50–600                      | 1.0–1.05   |
| carcinoma    | 30                                 | 0.16                                    | 0.5            | 5.4                                     | 60–600                      | 1.0–1.05   |
| HSPCs        | 20                                 | 0.06                                    | 0.6            | 6.3                                     | 50–175                      | 1.0–1.08   |
| MCF10A       | 20                                 | 0.04                                    | 0.5            | 5.7                                     | 75–320                      | 1.0–1.05   |
| iPSCs        | 20                                 | 0.04                                    | 0.5            | 5.7                                     | 50–500                      | 1.0–1.05   |
| dev neurons  | 20                                 | 0.04                                    | 0.5            | 5.7                                     | 25–300                      | 1.0–1.05   |
| MEFs         | 30                                 | 0.16                                    | 0.5            | 5.4                                     | 50–500                      | 1.0–1.05   |

**Supplementary Table 6 | siRNAs used in the knock-down experiments.**

| name      | target             | commercial name                                 | cat no           | vendor          |
|-----------|--------------------|-------------------------------------------------|------------------|-----------------|
| rLuc      | Renilla Luciferase | RLUC                                            | RLUC             | Eupheria Biotec |
| esiCAV1-1 | human caveolin 1   | hCAV1                                           | HU-03125-1       | Eupheria Biotec |
| esiCAV1-2 | human caveolin 1   | hCAV1, custom design                            | HU-03125-2       | Eupheria Biotec |
| esiCAV1-3 | human caveolin 1   | hCAV1, custom design                            | HU-03125-3       | Eupheria Biotec |
| nonT      | non-targeting      | ON-TARGETplus<br>Non-targeting Pool             | D-001810-10-05   | Dharmacon       |
| CAV1-pool | human caveolin 1   | ON-TARGETplus<br>Human CAV1 siRNA,<br>SMARTPool | L-003467-00-0005 | Dharmacon       |

**Supplementary Table 7 | Summary of details regarding transcriptomic profiling of the datasets used in this study.**

|                     | glioblastoma                                   | carcinoma                                               | HSPCs                                        | MCF10A                                  | iPSCs                          | developing neurons                                   |
|---------------------|------------------------------------------------|---------------------------------------------------------|----------------------------------------------|-----------------------------------------|--------------------------------|------------------------------------------------------|
| accession no        | GEO: GSE77751                                  | DDBJ: DRA000991                                         | GEO: GSE90552                                | GEO: GSE69822                           | GEO: GSE49940                  | GEO: GSE51606                                        |
| technology          | HT seq                                         | CAGE                                                    | HT seq                                       | HT seq                                  | microarray                     | HT seq                                               |
| instrument          | Illumina HiSeq 2500                            | Helicos HeliScope                                       | Illumina HiSeq 2500                          | Illumina HiSeq 2500                     | Illumina BeadArray Reader*     | Illumina HiSeq 2000                                  |
| platform ID         | GPL16791                                       | GPL14761                                                | GPL16791                                     | GPL16791                                | GPL6885                        | GPL13112                                             |
| sequencing depth    | 26–35 million single-end reads per sample      | 4 million mapped tags per sample                        | 27–56 million fragments per pooled libraries | 31 million single-end reads per library | N/A                            | 30–40 million reads per sample                       |
| RNA isolation       | total RNA, High Pure RNA Isolation Kit (Roche) | total RNA, miRNeasy Kit (Qiagen)                        | total RNA, trizol isolation                  | total RNA, RNeasy Kit (Qiagen)          | total RNA, RNeasy Kit (Qiagen) | polyA RNA, $\mu$ MACS™ mRNA Isolation Kit (Miltenyi) |
| library preparation | Ultra Directional RNA Library Prep (NEB)       | HeliScopeCAGE <sup>2</sup>                              | TruSeq RNA Sample Prep Kit (Illumina)        | TruSeq RNA Sample Prep Kit (Illumina)   | labelling with biotin          | custom protocol                                      |
| alignment           | to GRCh38 GSNAP (v 2014-12-17)                 | to GRCh37 Delve                                         | to GRCh38 GSNAP (v 2015-12-31)               | to GRCh37 TopHat (v 2.0.10)             | BeadStudio (v 3.2)             | to MGSCv37 BWA (v 0.5.9)                             |
| counting            | featureCounts (v 1.4.6)                        | decomposition peak identification (DPI) <sup>3,\$</sup> | featureCounts (v 1.5.0)                      | HTSeq (v 0.6.1) <sup>†</sup>            | BeadStudio (v 3.2)             | BEDtools (v 2.11)                                    |
| normalization       | size factor normalization (DESeq2 v 1.6.2)     | TPM - tags per million (edgeR)                          | size factor normalization (DESeq2 v 1.10.1)  | RPKM (DESeq2 v 1.4.5)                   | log2-scaling, qnt (Lumi)       | size factor normalization (DESeq v 1.8.1)            |

\*with mouseRef-8 v2 expression BeadChips (Illumina),

<sup>\$</sup>available at <https://github.com/hkawaji/dpi1/>,

<sup>†</sup>available at <http://www-huber.embl.de/users/anders/HTSeq/doc/count.html>



**Supplementary Table 8 | List of sample IDs assigned to the different cell states in the respective transcriptomic datasets.** sc – small-cell, sq – squamous cell, adeno – adenocarcinoma.

| dataset accession No              | cell state      | sample IDs                                                                                                                                                                                                                                                                                                 |
|-----------------------------------|-----------------|------------------------------------------------------------------------------------------------------------------------------------------------------------------------------------------------------------------------------------------------------------------------------------------------------------|
| glioblastoma<br>GSE77751          | FGFJl (soft)    | GSM2058533   GSM2058534   GSM2058535   GSM2058542  <br>GSM2058543   GSM2058544   GSM2058551   GSM2058552  <br>GSM2058553                                                                                                                                                                                   |
|                                   | EGF medium)     | GSM2058530   GSM2058531   GSM2058532   GSM2058539  <br>GSM2058540   GSM2058541   GSM2058548   GSM2058549  <br>GSM2058550                                                                                                                                                                                   |
|                                   | serum (stiff)   | GSM2058536   GSM2058537   GSM2058538   GSM2058545  <br>GSM2058546   GSM2058547   GSM2058554   GSM2058555  <br>GSM2058556                                                                                                                                                                                   |
| carcinoma<br>DRA000991            | sc (soft)       | 10589   10610*   10841   10541   10842   10562 <sup>\$</sup>   10609 <sup>§</sup>                                                                                                                                                                                                                          |
|                                   | sq (medium)     | 10717   10760   10692   10434   10550   10545   10544  <br>10463   10486 <sup>\$</sup>                                                                                                                                                                                                                     |
|                                   | adeno (stiff)   | 10796   10643   10614*   10612   10499 <sup>\$</sup>   10408   10648  <br>10784   10437   10417 <sup>§</sup>   10639   11843   11841   10693  <br>10797                                                                                                                                                    |
| HSPCs<br>GSE90552                 | VPA (soft)      | GSM2406738   GSM2406739   GSM2406740   GSM2406741                                                                                                                                                                                                                                                          |
|                                   | PBS (stiff)     | GSM2406734   GSM2406735   GSM2406736   GSM2406737                                                                                                                                                                                                                                                          |
| MCF10A<br>GSE69822                | WT (soft)       | GSM1709515   GSM1709516   GSM1709517                                                                                                                                                                                                                                                                       |
|                                   | H1047R (stiff)  | GSM1709572   GSM1709573   GSM1709574                                                                                                                                                                                                                                                                       |
| iPSCs<br>GSE49940                 | F-class (soft)  | GSM1544134   GSM1544135   GSM1544139   GSM1544140  <br>GSM1544146   GSM1544160                                                                                                                                                                                                                             |
|                                   | C-class (stiff) | GSM1544136   GSM1544137   GSM1544138   GSM1544141  <br>GSM1544142   GSM1544143   GSM1544144   GSM1544145  <br>GSM1544147   GSM1544148   GSM1544149   GSM1544150  <br>GSM1544151   GSM1544152   GSM1544153   GSM1544154  <br>GSM1544155   GSM1544156   GSM1544157   GSM1544158  <br>GSM1544159   GSM1544161 |
| developing<br>neurons<br>GSE51606 | PPs (soft)      | GSM1249110   GSM1249113   GSM1249116                                                                                                                                                                                                                                                                       |
|                                   | DPs (medium)    | GSM1249111   GSM1249114   GSM1249117                                                                                                                                                                                                                                                                       |
|                                   | NNs (stiff)     | GSM1249112   GSM1249115   GSM1249118                                                                                                                                                                                                                                                                       |

\*stomach, <sup>\$</sup>lung, <sup>§</sup>intestine

## Supplementary Figures

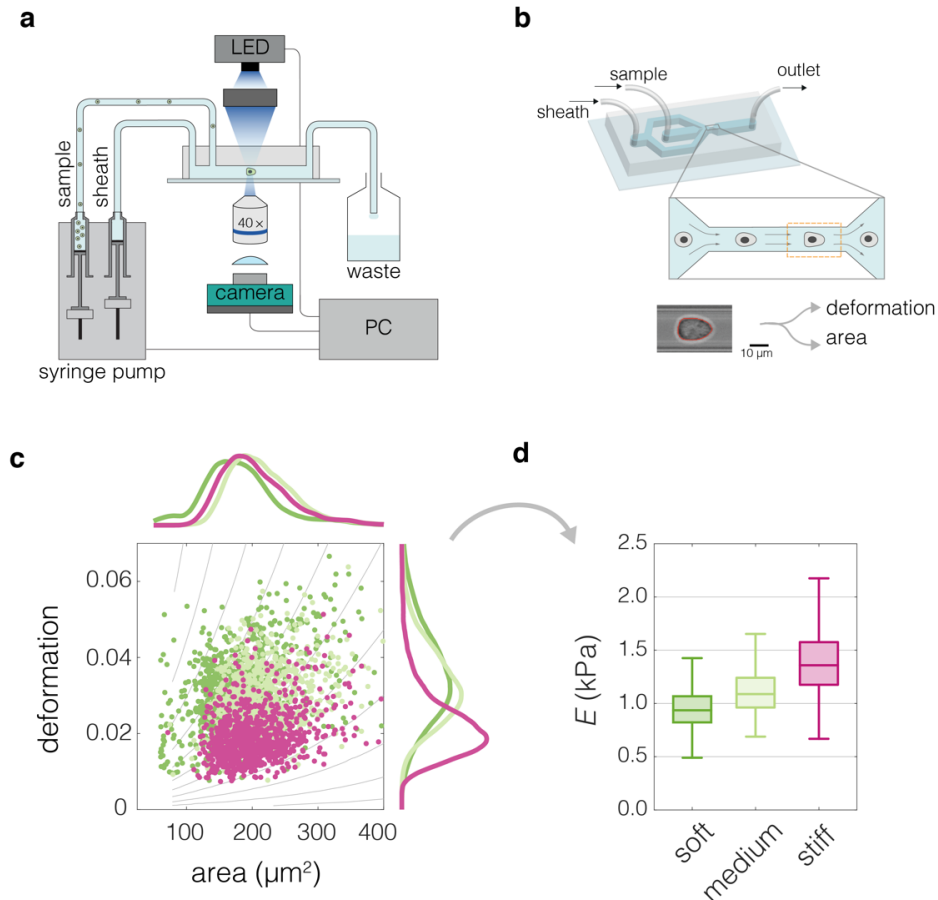

**Supplementary Figure 1 | Characterization of mechanical cell properties using real-time deformability cytometry (RT-DC).** **a**, Schematic overview of the RT-DC setup. Computer-operated syringe pumps flow the cell-containing sample as well as the sheath fluid into the microfluidic chip. Imaging of the cells deformed in the microfluidic channel is performed at 2,000 frames per second using an LED-based stroboscopic illumination and a CMOS camera. **b**, 3D illustration of the microfluidic chip used for the RT-DC measurements, close-up depicts the constriction of the channel in which cells are deformed, the imaged region of interest is indicated by an orange dashed line. At the bottom an exemplary image of a cell is shown. A contour is fitted to the cell in real time (marked in red), based on which cell area and deformation are calculated. **c**, An exemplary plot of deformation versus area of three different cell populations. The gray isoelasticity lines in the background indicate regions of the same apparent Young's moduli. **d**, Box plot of apparent Young's modulus,  $E$ , estimated based on deformation and area in **c**. The cell population with same area but higher deformation has lower  $E$  (bright green compared to magenta). For cells with similar deformation, the one of smaller area has lower  $E$  (dark green compared to bright green). The exemplary data in **c** and **d** corresponds to exemplary measurements of Wa-hT (dark green), EBC1 (bright green) and A549 (magenta) cell lines. The box plots in **d** spread from 25<sup>th</sup> to 75<sup>th</sup> percentiles with a line at the median, whiskers span 1.5x interquartile range (IQR).

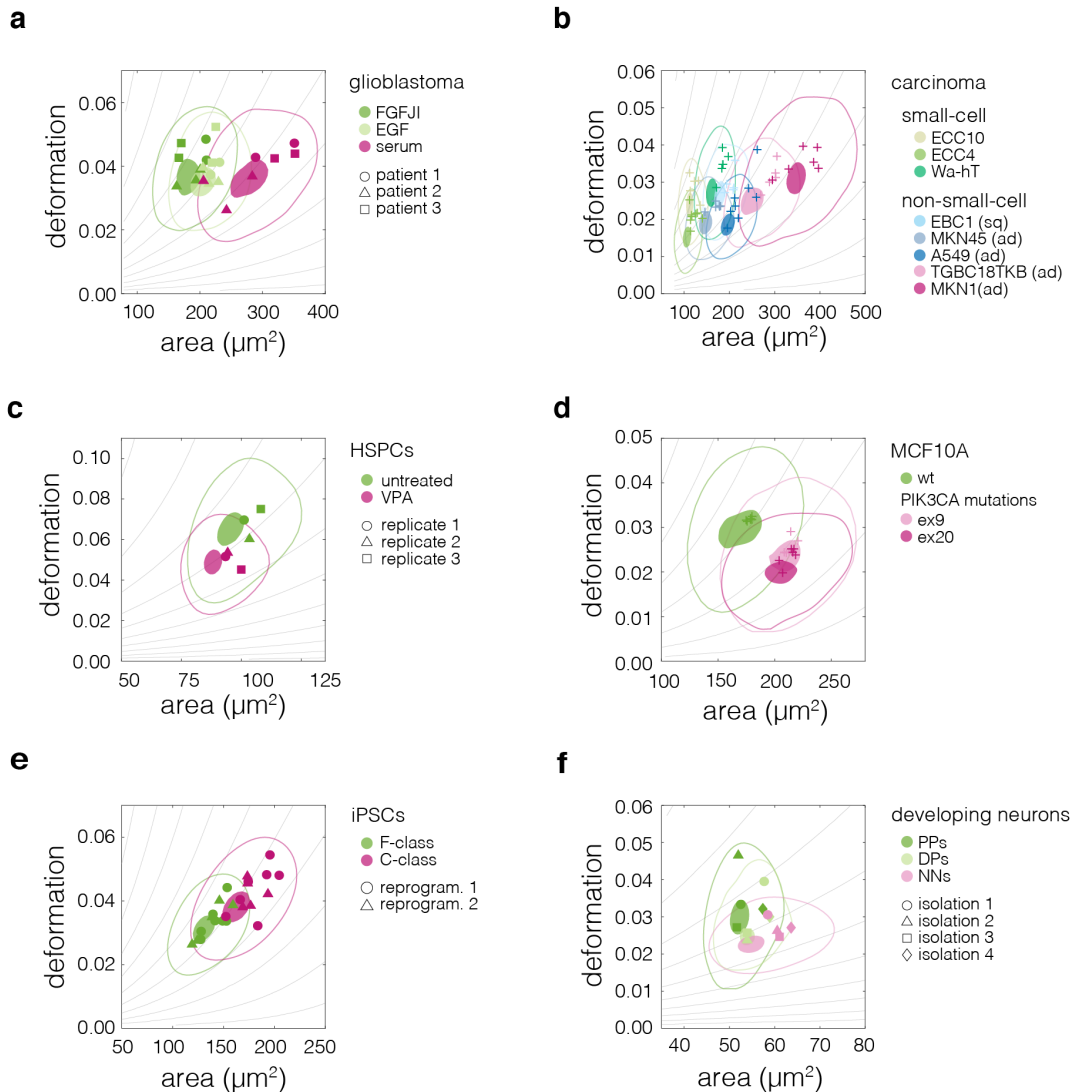

**Supplementary Figure 2 | Plots of area vs deformation for different cell states in characterized systems.** Panels correspond to the following systems: **a**, glioblastoma, **b**, carcinoma, **c**, human stem and progenitor cells (HSPCs), **d**, non-tumorigenic breast epithelia MCF10A, **e**, induced pluripotent stem cells (iPSCs), and **f**, developing neurons. 95%- and 50% density contours of data pooled from all measurements of given cell state are indicated by shaded areas and continuous lines, respectively. Datapoints indicate medians of individual measurements. The isoelasticity lines in the background (gray) indicate regions of the same apparent Young's moduli. DDs – differentiating progenitors, DPs – differentiating progenitors, NNs – newborn neurons.

**a**

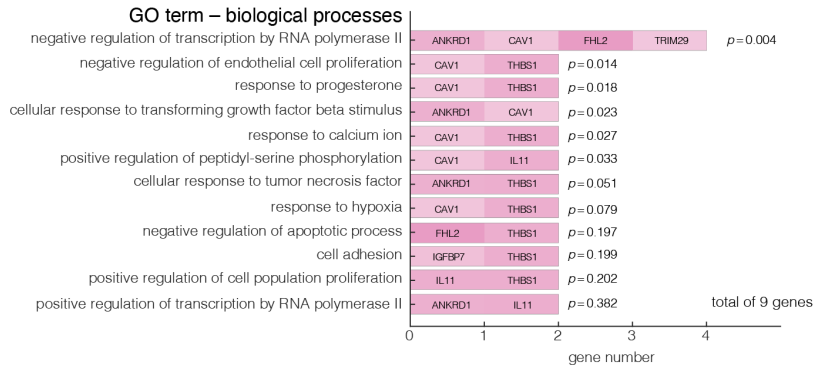

**b**

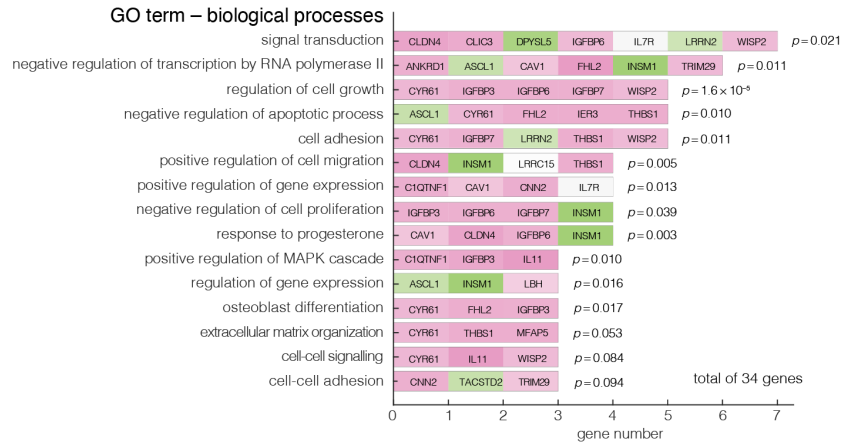

### Supplementary Figure 3 | Gene ontology (GO) enrichment analysis of obtained target genes.

Enriched GO terms of biological processes are summarized for **a**, 9 genes corresponding to the results from Figure 3g, **b**, 34 genes corresponding to all nodes presented in Figure 3e–g. The analysis was performed using *DAVID 6.8* functional annotation tool online, with *Homo sapiens* as background dataset, ENSEMBL gene IDs as input, and focused on direct GO terms for biological processes. Color code of the blocks corresponds to the level of expression in stiff states with green corresponding to low expression and magenta corresponding to high expression. The reported  $p$ -values are the Fisher's exact  $p$ -values obtained using a two tailed two sample t-test.

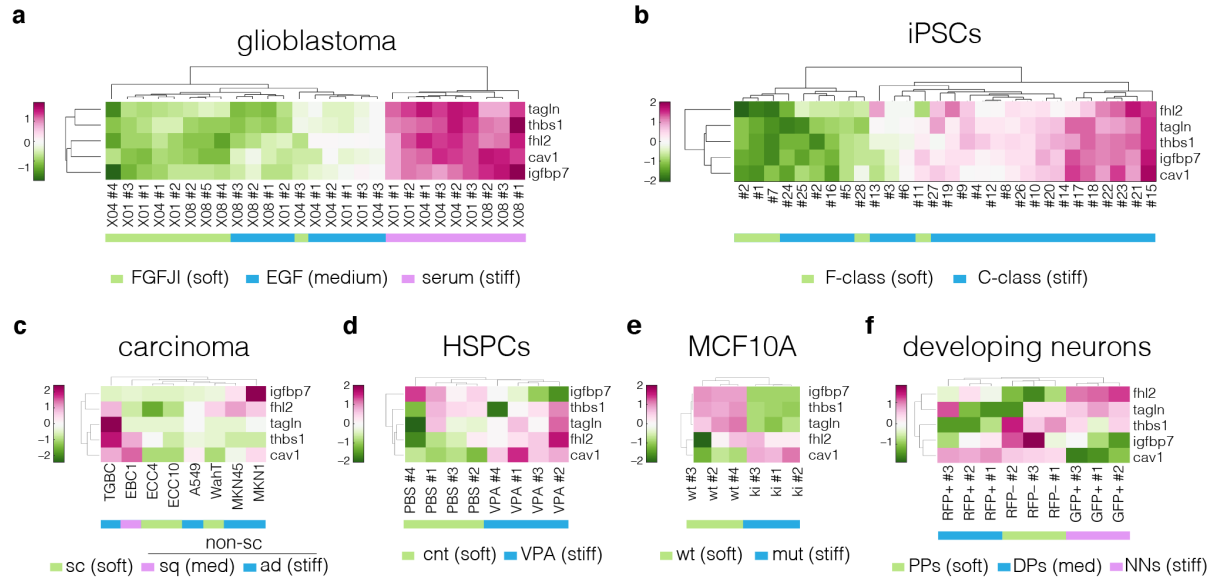

**Supplementary Figure 4 | Expression of identified target genes in the discovery and validation datasets.** Panels show unsupervised clustering heat maps of expression data from transcriptomic datasets corresponding to the following systems: **a**, glioblastoma, **b**, carcinoma, **c**, human stem and progenitor cells (HSPCs), **d**, non-tumorigenic breast epithelia MCF10A, **e**, induced pluripotent stem cells (iPSCs), and **f**, developing neurons. sc – small-cell carcinoma, non-sc – non-small-cell carcinoma, sq – squamous cell carcinoma, adeno – adenocarcinoma, cnt – untreated control, VPA – valproic acid, wt – wild type, mut – mutant, PPs – proliferating progenitors, DPs – differentiating progenitors, NNs – newborn neurons. Clustering was performed using *clustergram* function in *MATLAB (R2020a, MathWorks)* on log2 of expression data.

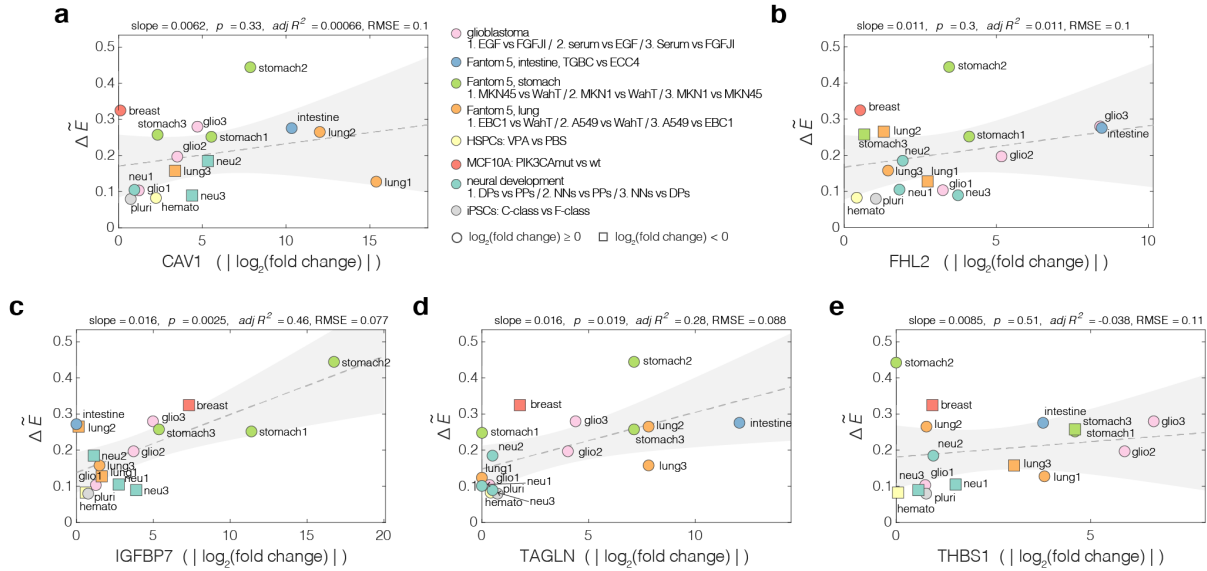

**Supplementary Figure 5 | Relation between the magnitude of apparent Young's modulus change and the absolute change in the expression levels of target genes.** Plots of normalized change in apparent Young's modulus  $\Delta\tilde{E}$  versus absolute value of change in expression for the target genes from conserved module: **a**, CAV1, **b**, FHL2, **c**, IGFBP7, **d**, TAGLN, **e**, THBS1. Every soft-stiff state pair from the respective datasets is presented as an individual point.  $\Delta\tilde{E} = \frac{E_{stiff} - E_{soft}}{E_{stiff}}$ , where  $E_{stiff}$  and  $E_{soft}$  correspond to the apparent Young's moduli (mean of all measurements) of the stiff and soft states within the given pairs, respectively. The dashed lines correspond to linear fits to data, with gray-shaded areas representing 95% confidence intervals.

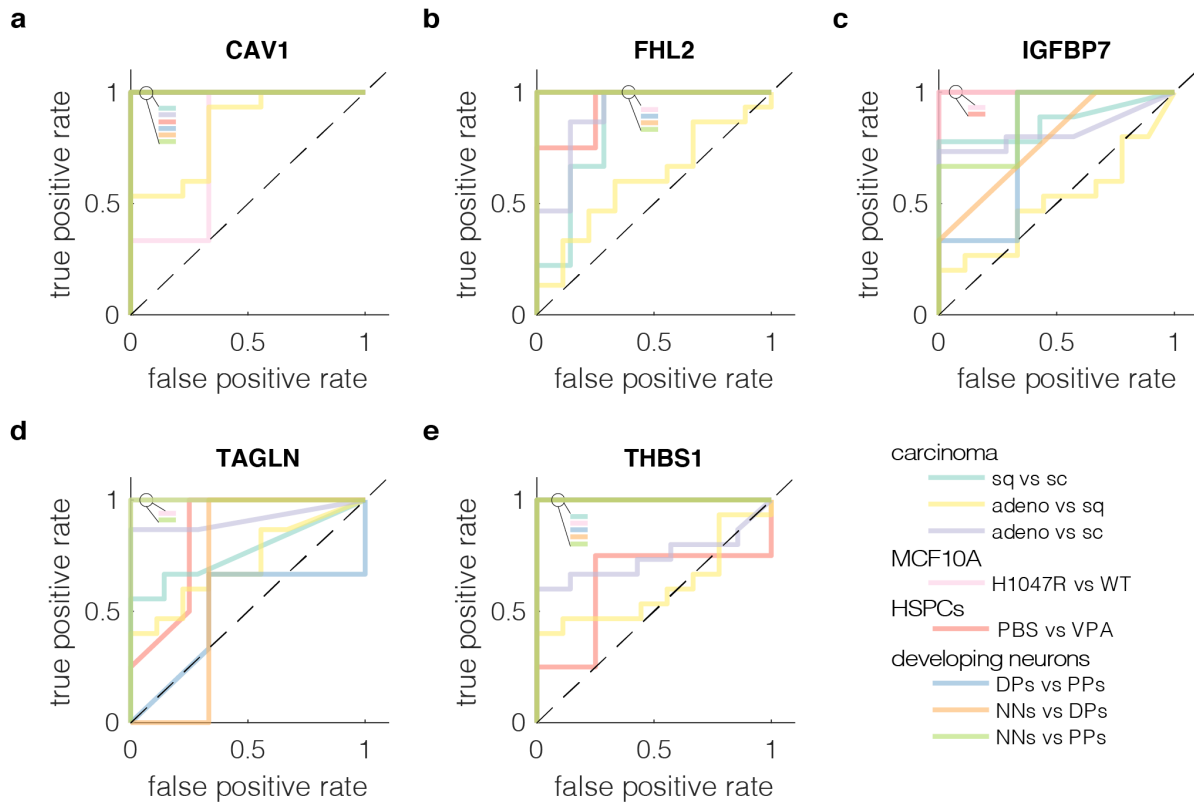

**Supplementary Figure 6 | ROC curves characterizing classification performance of the five genes from the conserved module.** True positive rate was plotted against the false positive rate at different classification thresholds for each soft-stiff phenotype pair from the validation datasets for: **a**, CAV1, **b**, FHL2, **c**, IGFBP7, **d**, TAGLN, and **e**, THBS1. The insets in the upper left corners of the plot show the colors of all overlying curves with AUC = 1. The ROC curves were constructed using *perfcurve* function in *MATLAB (R2020a, MathWorks)*. sc – small cell carcinoma, sq – squamous cell carcinoma, adeno – adenocarcinoma, wt, wild type, cnt – control, VPA – valproic acid, PPs – proliferating progenitors, DPs – differentiating progenitors, NNs – newborn neurons.

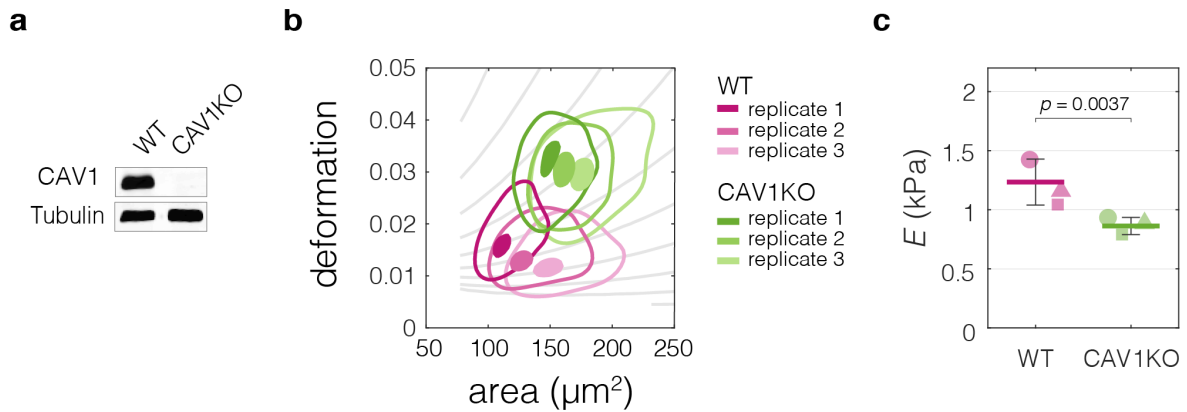

**Supplementary Figure 7 | CAV1 knock-out mouse embryonic fibroblasts (CAV1KO) have lower stiffness compared to the wild type cells (WT).** **a**, Western blot analysis of CAV1 expression levels in CAV1KO compared to WT cells. **b**, Plots of area vs deformation for CAV1KO and WT cells characterized with RT-DC. Contour plots delineate 95% and 50% density areas (solid lines and filled area, respectively) of data from individual measurement replicates ( $n = 3$ ). The isoelasticity lines in the background (gray) indicate regions of the same apparent Young's moduli. **c**, Apparent Young's modulus values estimated for WT and CAV1KO cells using area-deformation data in **a**. Horizontal lines delineate medians with mean absolute deviation (MAD) as error, datapoints represent medians of the individual replicates. Statistical analysis was performed using generalized linear mixed effects model.



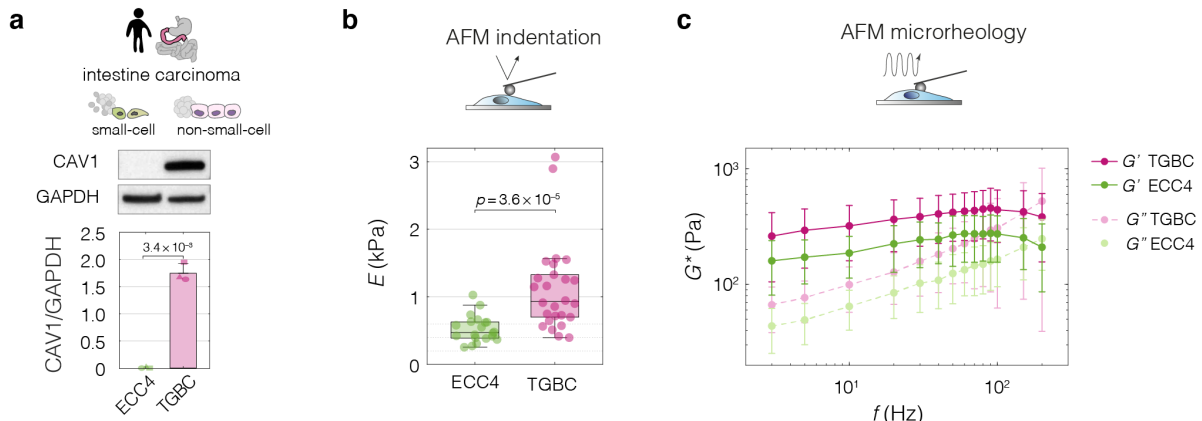

**Supplementary Figure 8 | CAV1 expression and mechanical characterization with AFM of small-cell (ECC4) vs non-small-cell (TGBC) carcinoma cell lines from intestine.** **a**, ECC4 do not show detectable levels of CAV1, while TGBC have considerable basal CAV1 expression. For the Western blot analysis representative blots (top) as well as quantification (bottom,  $n = 3$ ) are shown. **b**, ECC4 show lower apparent Young's moduli than TGBC in AFM indentation experiments. Box plots spread from 25<sup>th</sup> to 75<sup>th</sup> percentiles with a line at the median, whiskers span 1.5x interquartile range (IQR), individual datapoints correspond to values obtained for individual cells (number of measured cells  $n = 20$  and 26 for ECC4 and TGBC, respectively). Statistical analysis was performed using two-sided two-sample t-test (a) or two-sided Wilcoxon rank sum test (b). **c**, ECC4 show storage and shear moduli lower than TGBC in AFM microrheology measurements. Datapoints correspond to means  $\pm$  standard deviation of all measurements at given oscillation frequencies ( $n = 18$  and 27 for each frequency for ECC4 and TGBC, respectively). Lines connecting datapoints serve as guides for the eye.

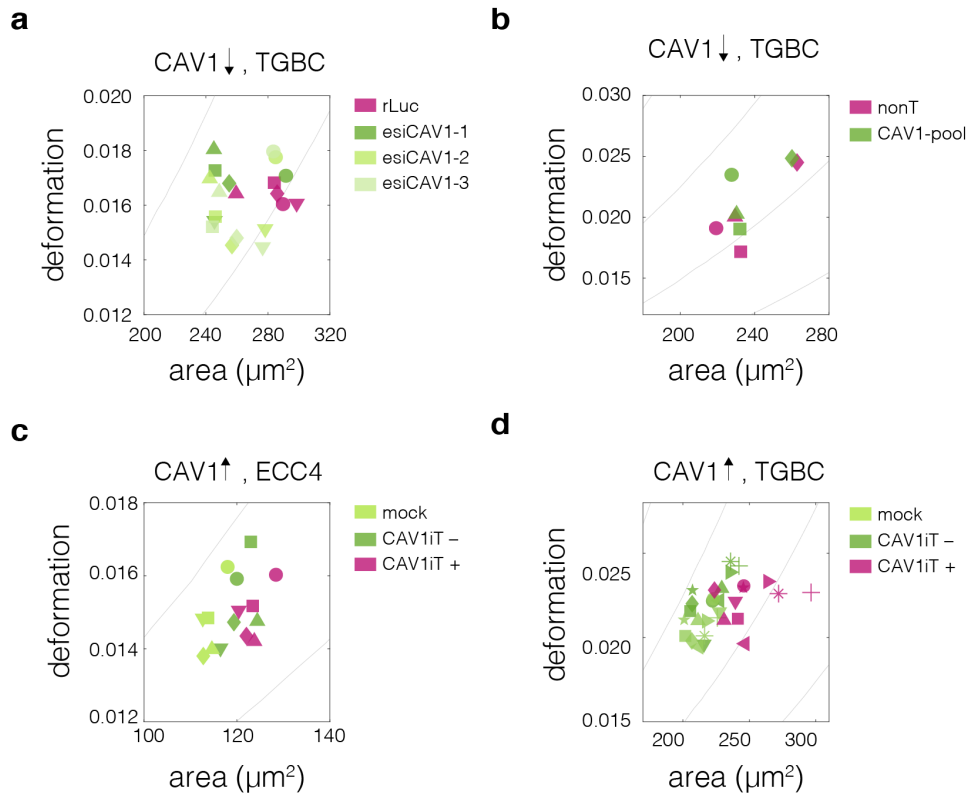

**Supplementary Figure 9 | Plots of area vs deformation from RT-DC measurements of cells with perturbed CAV1 levels.** Panels correspond to the following experiments: **a–b**, CAV1 knock-down in TGBC cells using esiRNA (a) and ONTarget siRNA (b), **c–d**, transient CAV1 overexpression in ECC4 cells (c) and TGBC cells (d). Datapoints indicate medians of individual measurement replicates. The isoelasticity lines in the background (gray) indicate regions of same mechanical properties.

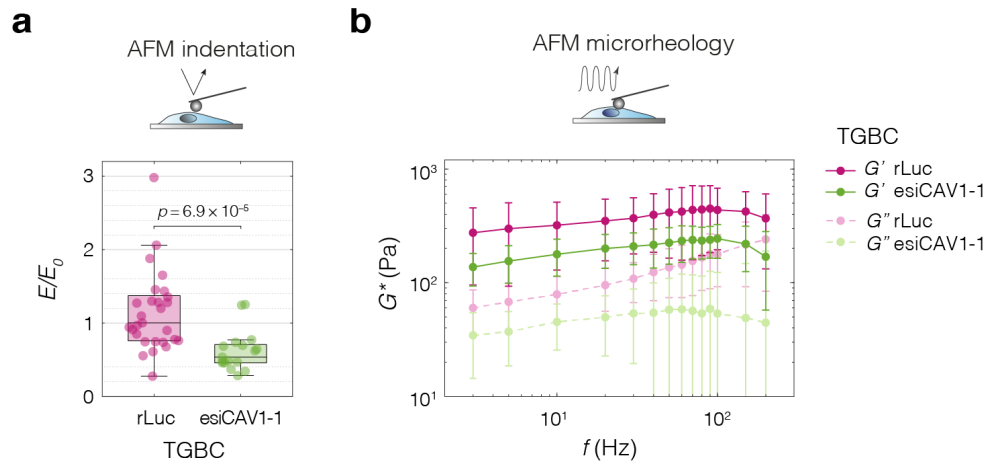

**Supplementary Figure 10 | TGBC cells show decreased stiffness upon CAV1 knock-down as measured by AFM. a**, After CAV1 knock-down (esiCAV1-1), the TGBC cells show lower apparent Young's moduli than control cells transfected with non-targeting esiRNA (rLuc). Box plots spread from 25<sup>th</sup> to 75<sup>th</sup> percentiles with a line at the median, whiskers span 1.5x interquartile range (IQR), individual datapoints correspond to values obtained for individual cells (number of measured cells  $n = 29$  and  $17$  for rLuc and esiCAV1-1 conditions, respectively). Statistical analysis was performed using two sample two-sided Wilcoxon rank sum test. **b**, After CAV1 knock-down (esiCAV1-1), the TGBC cells show storage and shear modulus lower than the control cells (rLuc) in AFM microrheology measurements. Datapoints correspond to means  $\pm$  standard deviation of all measurements at given oscillation frequencies ( $n = 32$  and  $18$  for each frequency for rLuc and esiCAV1-1 conditions, respectively). Lines connecting datapoints serve as guides for the eye.

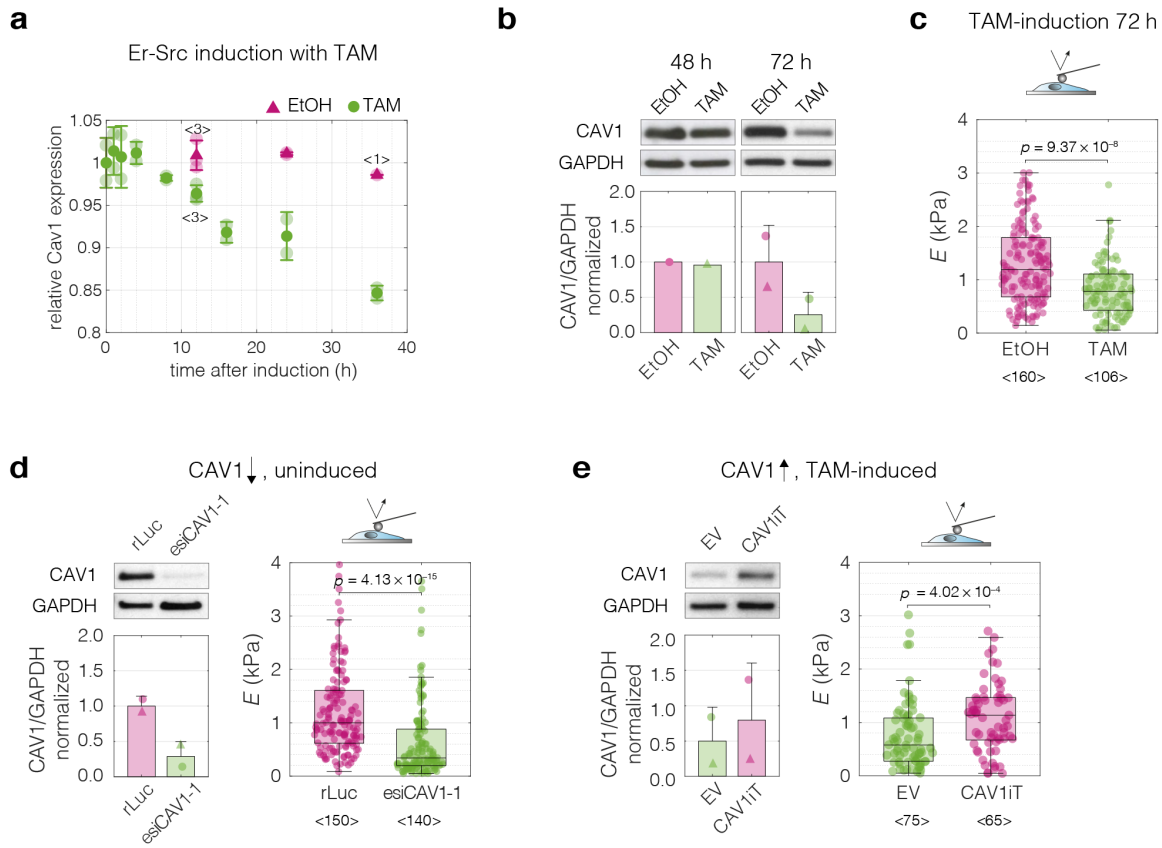

**Supplementary Figure 11 | Perturbations of CAV1 levels in MCF10A-ER-Src cells result in cell stiffness changes.** **a**, Inducing transformation of MCF10A- ER-Src cells by tamoxifen (TAM) treatment, as opposed to vehicle control (ethanol, EtOH), causes a decrease of CAV1 expression over time, as captured by microarray analysis<sup>4</sup>. Datapoints with error bars represent means  $\pm$  standard deviation ( $n = 2$ , unless indicated otherwise). **b**, Western blot analysis shows the decrease of CAV1 at protein level 72 h post induction. **c**, MCF10A-ER-Src cells show decreased apparent Young's moduli 72 h post TAM induction. **d**, CAV1 knock-down in uninduced MCF10A-ER-Src cells results in lowering of the apparent Young's modulus. **e**, Overexpression of CAV1 in TAM-induced MCF10A-ER-Src cells causes increase in the apparent Young's modulus and effectively reverts the softening caused by TAM induction (compare to panel c). Box plots in c–e spread from 25<sup>th</sup> to 75<sup>th</sup> percentiles with a line at the median, whiskers span 1.5x interquartile range (IQR), individual datapoints correspond to values obtained for individual cells, the number of measured cells per conditions, pooled from  $n = 3$  independent experiments, is indicated below each box. Statistical analysis was performed using a two-sided Wilcoxon rank sum test.

## Supplementary References

1. Herold, C. Mapping of Deformation to Apparent Young's Modulus in Real-Time Deformability Cytometry. (2017).
2. Itoh, M. *et al.* Automated workflow for preparation of cDNA for cap analysis of gene expression on a single molecule sequencer. *PLoS One* **7**, (2012).
3. Forrest, A. R. R. *et al.* A promoter-level mammalian expression atlas. *Nature* **507**, 462–470 (2014).
4. Hirsch, H. A. *et al.* A Transcriptional Signature and Common Gene Networks Link Cancer with Lipid Metabolism and Diverse Human Diseases. *Cancer Cell* **17**, 348–361 (2010).
